# Supplementary material
Source: publisher figshare collection journal article supplement (https://gsapubs.figshare.com/ndownloader/files/38375792)
Supplement: Supplementary file 1 [file 38375792]

## Sheet: Sheet1
Supplementary Table 3. Triple O and conventional δ18O measurements of samples from the Keivy complex
	Sample	Locality	Label on Fig. 1A	Lithology	Material analyzed	δ17O ‰ VSMOW	δ18O ‰ VSMOW		Δ17O ‰ VSMOW (0.528 reference line)		δ'17O ‰ VSMOW	δ'18O ‰ VSMOW		Δ'17O ‰ VSMOW (0.528 reference line)
Triple oxygen isotope measurements (University of Goettingen). Uncertainties (1σ): ±0.3 ‰ for δ18O and ±0.01 ‰ for Δ17O)
	LW46	Lavrentevskii	1	granite	quartz	1.6281	3.1889		-0.0556425		1.62677	3.18383		-0.0542874
	LV12	Lavrentevskii	1	granite	whole rock	-2.9737	-5.561		-0.03749		-2.97813	-5.57652		-0.0337258
	WT5-1	White Tundra	1	granite	quartz	2.67709	5.196		-0.0663934		2.67352	5.18255		-0.0628674
	WT5-6	White Tundra	1	granite	amphibole	-0.480699	-0.7966		-0.0600942		-0.480815	-0.796917		-0.0600422
	FM20	West Keivy	2	granite	aegirine	-2.54609	-4.7313		-0.0479685		-2.54934	-4.74253		-0.0452869
	FM20	West Keivy	2	granite	quartz	-0.272499	-0.429		-0.0459875		-0.272537	-0.429092		-0.045976
	PB172	Rovozero, West Keivy	2	altered gneiss	whole rock	-3.59429	-6.7686		-0.0204677		-3.60076	-6.79161		-0.0147929
	PB172	Rovozero, West Keivy	2	altered gneiss	amphibole	-4.37775	-8.2254		-0.0347354		-4.38736	-8.25942		-0.0263857
	JU47	Jumperuaiv, West Keivy	2	altered gneiss	whole rock	-1.18151	-2.169		-0.0362744		-1.1822	-2.17136		-0.0357291
	LV50V	Lavrentevskii	3	altered gneiss	amphibole	-4.19851	-7.8823		-0.0366556		-4.20735	-7.91353		-0.0290049
	PM5	Ponoiskii	4	granite	quartz	0.551499	1.1143		-0.0368515		0.551347	1.11368		-0.036676
Conventional oxygen isotope measurements (University of Lausanne). Uncertainty (1σ): ±0.1 ‰ for δ18O
	WT1-3	White Tundra	1	granite	zircon		2.65838
	PB161	Rovozero, W.Keivy	Q	quartzolite	quartz		-3.73525

## Sheet: G50702
Zakharov, D.O., Zozulya, D.R., and Colòn, D.P., 2023, Quantitative record of the Neoarchean water cycle from a 2.67 Ga magmatic-hydrothermal system, Fennoscandian Shield: Geology, https://doi.org/10.1130/G50702.1
